# Supplementary material
Source: Research Square preprint supplement (doi:10.21203/rs.3.rs-9902589/v1)
Supplement: Supplementary file 1 [file 602473bf6b4d88707380372a.pdf]

## Supplementary Information

for

### Scaffold-level validation is needed for phage-host inference from metagenome-assembled genomes

Ling Yuan (袁凌)<sup>1</sup>, Karthik Anantharaman<sup>2</sup>, Bin Ma (马斌)<sup>3,4</sup>, Antonio Perdo Camargo<sup>5,\*</sup>, LinXing Chen (陈林兴)<sup>1,\*</sup>

<sup>1</sup> State Key Laboratory of Advanced Environmental Technology, the Department of Environmental Science and Engineering, University of Science and Technology of China, Hefei, China

<sup>2</sup> Department of Bacteriology, University of Wisconsin-Madison, Madison, WI, USA

<sup>3</sup> State Key Laboratory of Soil Pollution Control and Safety, Zhejiang University, Hangzhou, 310058, China

<sup>4</sup> Zhejiang Provincial Key Laboratory of Agricultural, Resources and Environment, College of Environmental and Resource Sciences, Zhejiang University, Hangzhou, 310058, China

<sup>5</sup> Department of Biochemistry, Institute of Chemistry, University of São Paulo, São Paulo, SP 05508-060, Brazil

\*Corresponding author:

Antonio Pedro Camargo, [antonio@iq.usp.br](mailto:antonio@iq.usp.br)

LinXing Chen, [linxingchen@ustc.edu.cn](mailto:linxingchen@ustc.edu.cn)

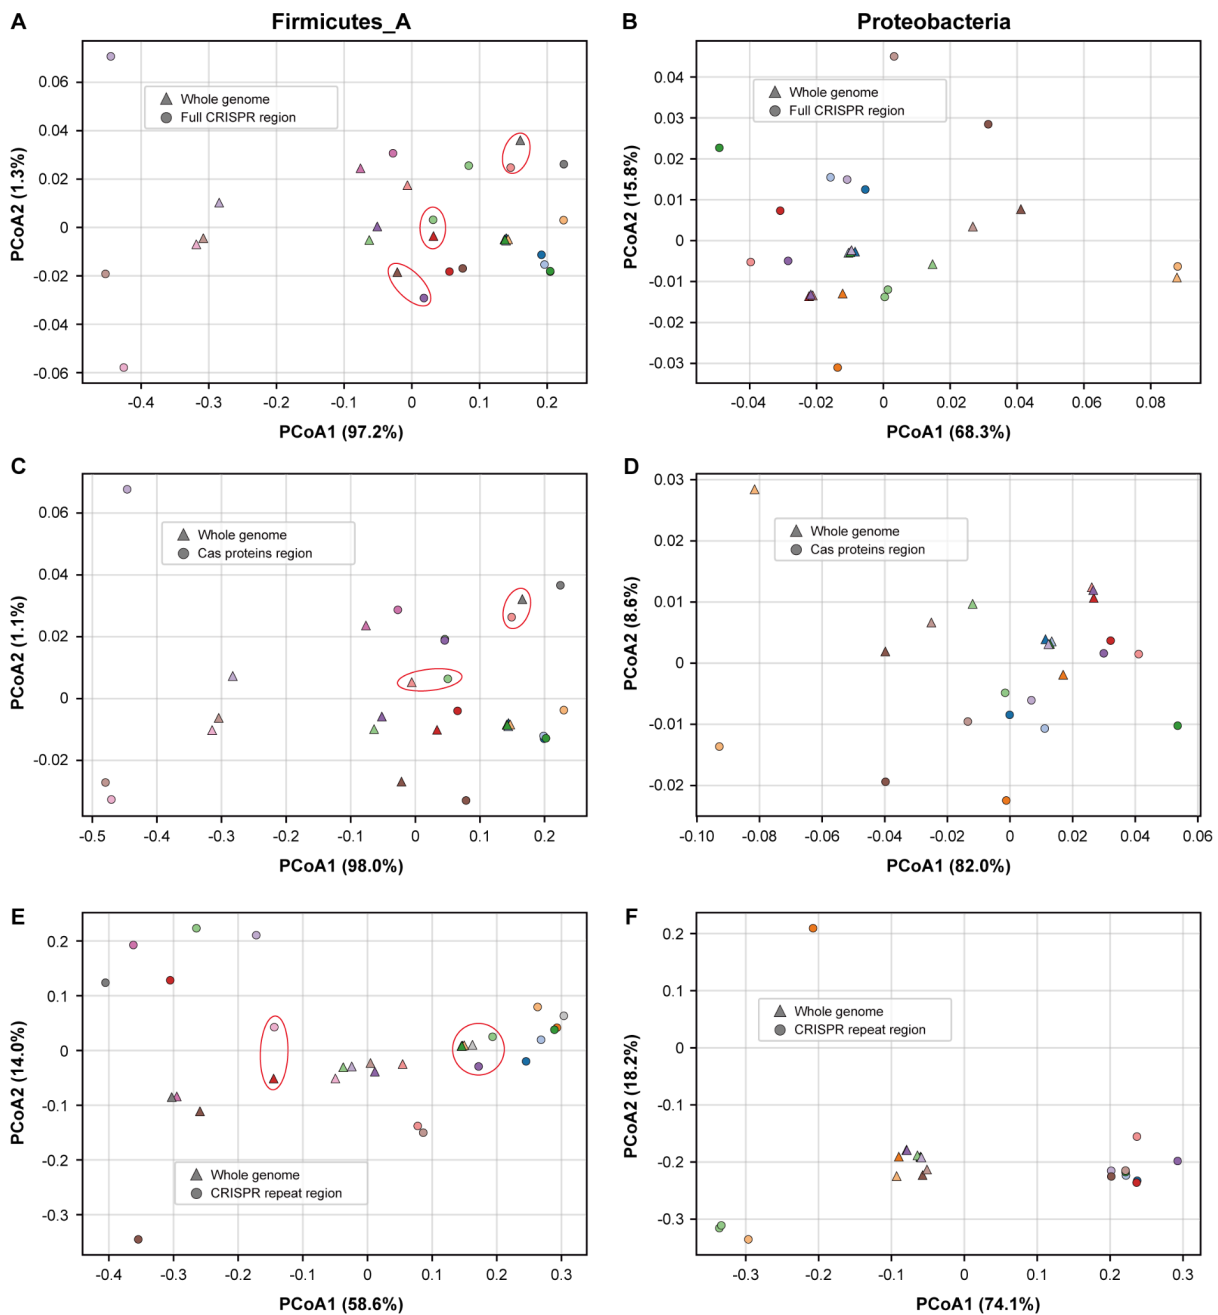

**Figure S1 | TNF-based PCoA comparison of CRISPR-related sequences against the whole genomes at the genome level.** Comparison of the whole genomes against (A) and (B) the full CRISPR-cas system regions, (C) and (D) the cas proteins regions, (E) and (F) the CRISPR repeat regions, for those from the phylum of (A) (C) (E) Firmicutes\_A and (B) (D) (F) Pseudomonadota. Red circles indicate sequences of whole genomes and CRISPR-related regions from different genome, which could be binned together if with comparative sequencing depth and presented in the same community.
